# Supplementary material for: Three-dimensional, hetero-structured, Cu3P@C nanosheets with excellent cycling stability as Na-ion battery anode material
Source: Royal Society of Chemistry journal article supplement (doi:10.1039/c9ta04035h), 2019-01-01
Supplement: c9ta04035h1.pdf [file c9ta04035h1.pdf]

## Supporting Information

### **Three-Dimensional, Hetero-structured, Cu<sub>3</sub>P@C Nanosheets with Excellent Cycling Stability as Na-ion Battery Anode Material**

Jinliang Zhu<sup>a,\*</sup>, Qiuchen He<sup>a</sup>, Yang Liu<sup>a</sup>, Julian Key<sup>a</sup>, Shuangxi Nie<sup>b</sup>, Mingmei Wu<sup>c</sup> and Pei Kang Shen<sup>a,\*</sup>

<sup>a</sup> Collaborative Innovation Center of Sustainable Energy Materials, School of Resources, Environment and Materials, Guangxi University, 100 Daxue Dong Road, Nanning 530004, PR China.

<sup>b</sup> Guangxi Key Laboratory of Clean Pulp & Papermaking and Pollution Control, Guangxi University, 100 Daxue Dong Road, Nanning 530004, PR China.

<sup>c</sup> School of Chemistry, Sun Yat-sen University, Guangzhou 510275, PR China.

\* Corresponding author. E-mail: jlzhu@163.com (Jinliang Zhu), stsspk@mail.sysu.edu.cn (Pei Kang Shen), Fax: +86 07713237990, Tel: +86 07713237990.

**Table S1.** The main synthesis methods of copper phosphides reported in literatures

| Copper phosphide     | Mophology                  | Synthesis                                | Phosphorus source and precursor                                                | Ref.           |
|----------------------|----------------------------|------------------------------------------|--------------------------------------------------------------------------------|----------------|
| Cu <sub>3</sub> P    | Amorphous form             | Solid state synthesis                    | Red phosphorus + Cu (or electrodeposited copper)                               | [S1]<br>[S2]   |
| Cu <sub>3</sub> P    | Powder                     | Solvothermal synthesis                   | White phosphorus + CuCl <sub>2</sub> ·2H <sub>2</sub> O                        | [S3]           |
| Cu <sub>3</sub> P    | Particle                   | Solvothermal synthesis                   | Red phosphorus + CuCl <sub>2</sub> ·2H <sub>2</sub> O                          | [S4]           |
| Cu <sub>3</sub> P    | Aggregated nanoparticle    | Solvothermal synthesis                   | Yellow phosphorus + CuCl <sub>2</sub> ·2H <sub>2</sub> O                       | [S5]           |
| Cu <sub>3</sub> P    | Polydispersed particle     | Solvothermal synthesis                   | White phosphorus + Prepared Cu nanoparticle                                    | [S6]           |
| Cu <sub>3</sub> P    | Nanorod                    | Solvothermal synthesis                   | Yellow phosphorus + CuCl <sub>2</sub> ·2H <sub>2</sub> O                       | [S7]           |
| Cu <sub>3</sub> P    | Nanopillar                 | Solid-vapor reaction                     | Red phosphorus + Electrodeposited Cu nanorod                                   | [S8]           |
| Cu <sub>3</sub> P    | Powder                     | Ball milling                             | Red phosphorus + Copper powder                                                 | [S9]           |
| Cu <sub>3</sub> P    | Powder                     | Solid-state reaction                     | Red phosphorus + Cu                                                            | [S10-S12]      |
| Cu <sub>3</sub> P    | Micronic sphere            | Solvothermal synthesis                   | Yellow phosphorus+ CuSO <sub>4</sub> ·5H <sub>2</sub> O or Cu(OH) <sub>2</sub> | [S13]<br>[S14] |
| Cu <sub>3</sub> P    | Sheet-like nanocrystalline | Hydrothermal synthesis                   | Yellow phosphorous + CuCl <sub>2</sub> ·2H <sub>2</sub> O                      | [S15]          |
| Cu <sub>3</sub> P    | Platelet                   | Solvothermal synthesis                   | PH <sub>3</sub> gas + CuCl                                                     | [S16]          |
| Cu <sub>3</sub> P    | Nanowire                   | Thermal decomposition                    | Sodium hypophosphite + Cu(OH) <sub>2</sub> nanowire                            | [S17]          |
| Cu <sub>3</sub> P    | Plate-like nanocrystal     | Solvothermal using standard Schlenk line | TOPO, TOP + CuCl                                                               | [S18]<br>[S19] |
| Cu <sub>3</sub> P/Cu | Aggregated particle        | High temperature reaction                | Red phosphorus + Cu foam                                                       | [S20]          |
| CuP <sub>2</sub>     | Nanoparticle               | Solvothermal synthesis                   | White phosphorus + prepared Cu nanoparticle                                    | [S21]          |
| CuP <sub>2</sub>     | Textured powder            | Solid-state reaction                     | White phosphorus + CuCl <sub>2</sub>                                           | [S22]          |
| CuP <sub>2</sub>     | Particle                   | Ball milling                             | Red phosphorus + Copper powder                                                 | [S23]          |
| Cu <sub>3</sub> P    | Nanosheet                  | Heat treatment                           | P-containing resin + Cu foam                                                   | This work      |

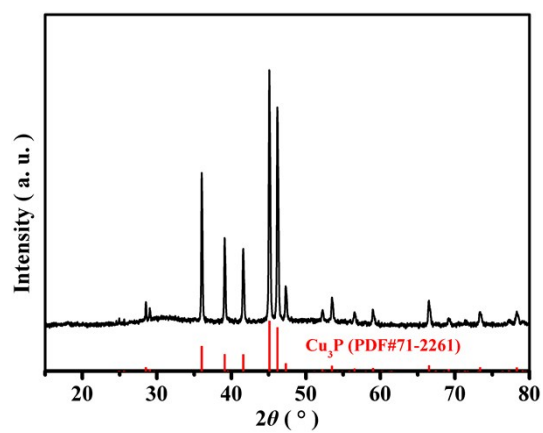

**Fig. S1** XRD pattern of Cu<sub>3</sub>P powder.

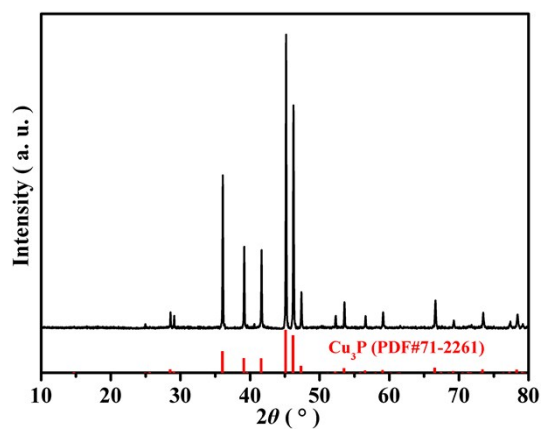

**Fig. S2** XRD pattern of Cu<sub>3</sub>P/C.

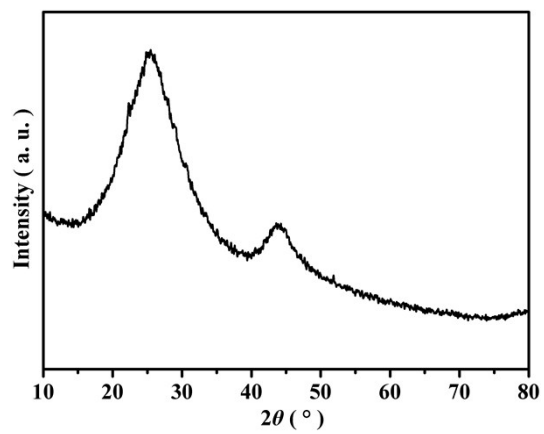

**Fig. S3** XRD pattern of C<sup>P</sup>.

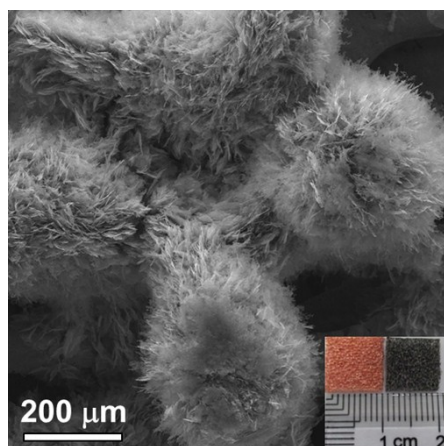

Fig. S4 SEM image of  $\text{Cu}_3\text{P}@C5$ .

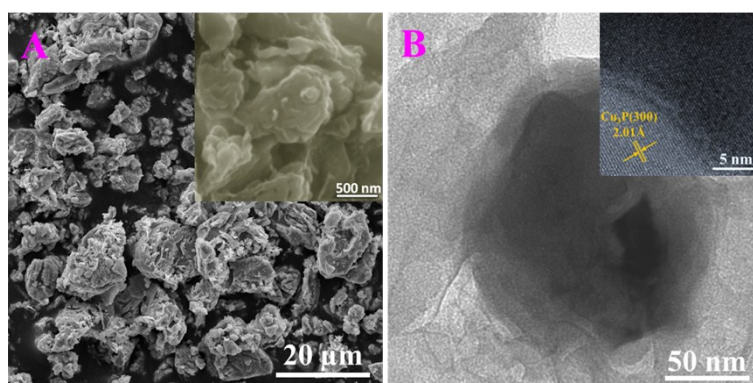

Fig. S5 SEM and TEM images of  $\text{Cu}_3\text{P}$  powder.

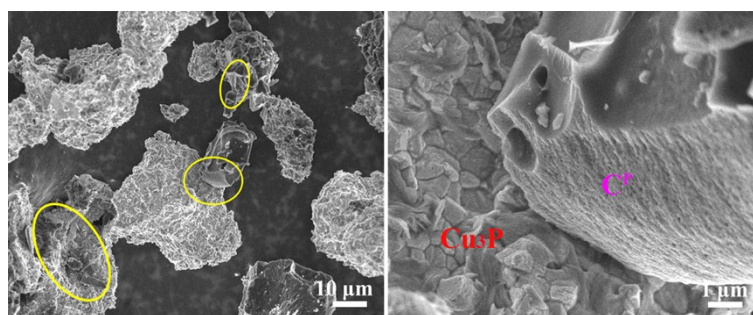

Fig. S6 SEM images of  $\text{Cu}_3\text{P}/C$

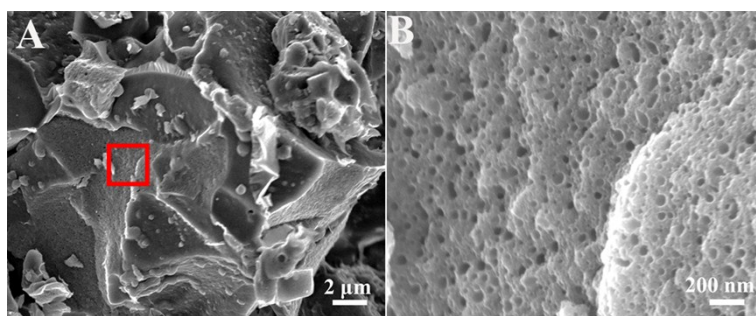

**Fig. S7** SEM images of C<sup>P</sup>

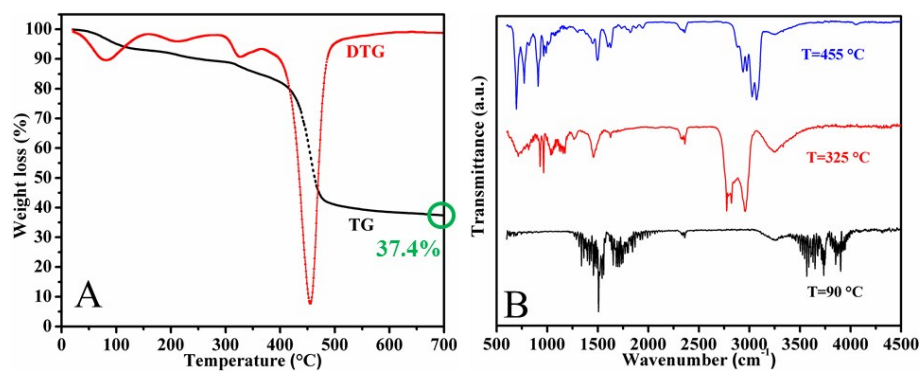

**Fig. S8** (A) TG-DTG of the resin in N<sub>2</sub> from 25 °C to 800 °C and (B) FTIR spectra of the corresponding pyrolysis products at 90, 325 and 455 °C, respectively.

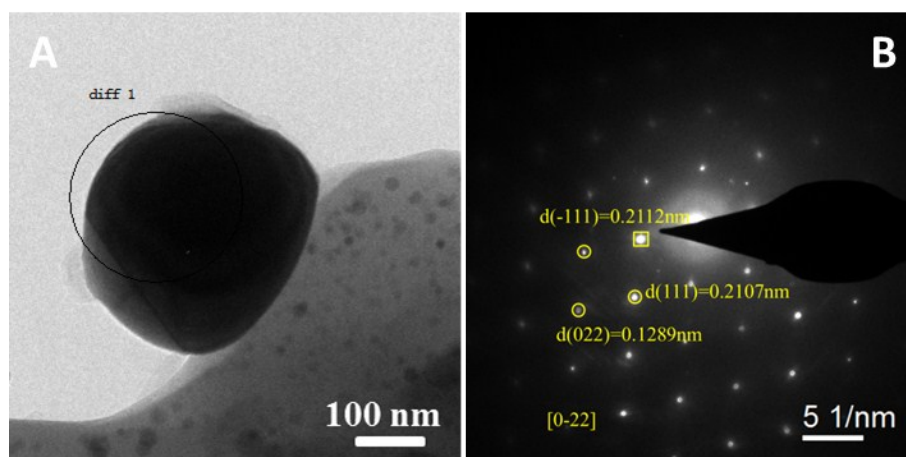

**Fig. S9** (A) TEM image and (B) selected-area electron diffraction of a sphere-like Cu particles.

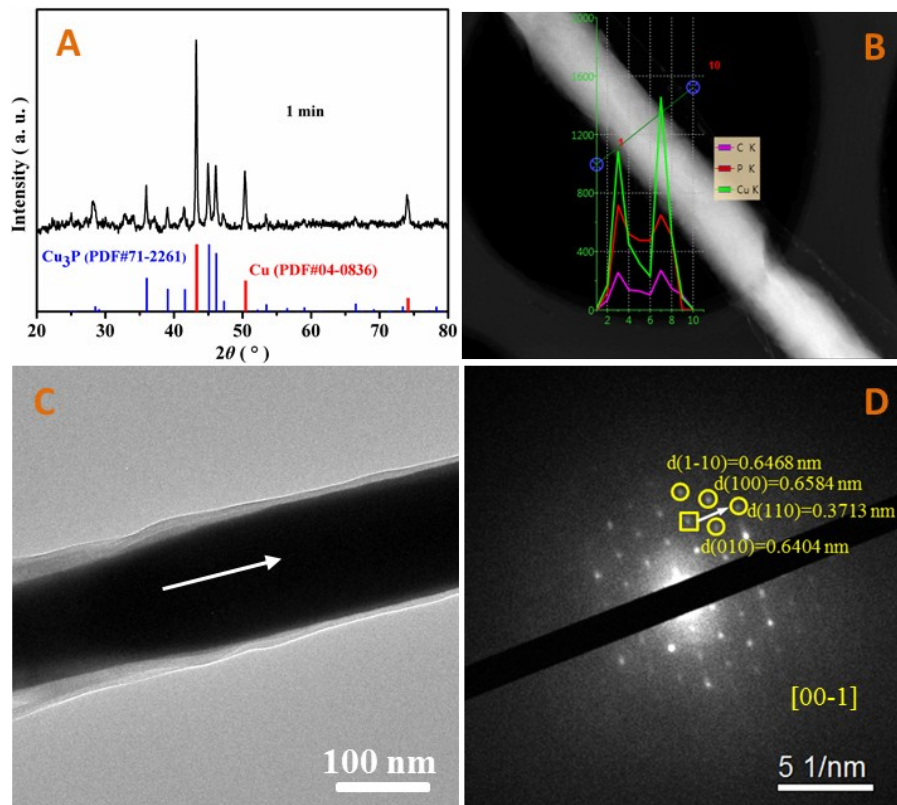

**Fig. S10** (A) XRD pattern, (B) EDS line scanning curve, (C) TEM image and (D) selected-area electron diffraction of a single nanobelt at 900 °C 1 min.

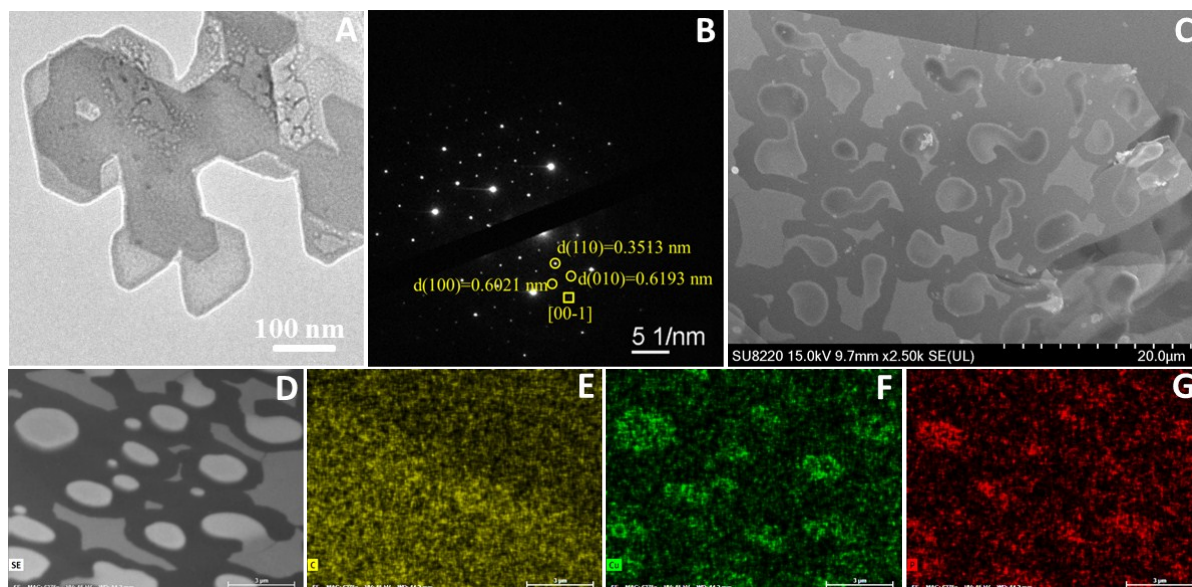

**Fig. S11** (A) TEM image, (B) selected-area electron diffraction, (C, D) SEM image and (E) C mapping, (F) Cu mapping and (G) P mapping of a growing nanosheet at 900 °C 30 min.



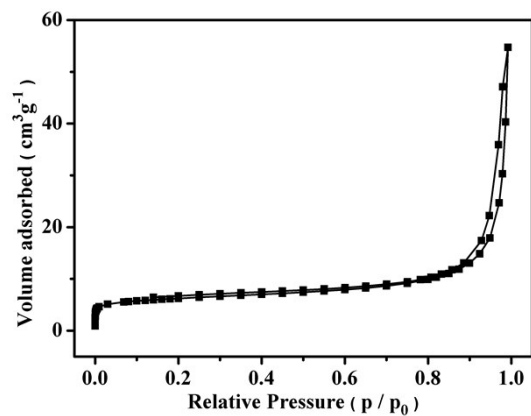

Fig. S12 N<sub>2</sub> adsorption-desorption isotherm of Cu<sub>3</sub>P@C5.

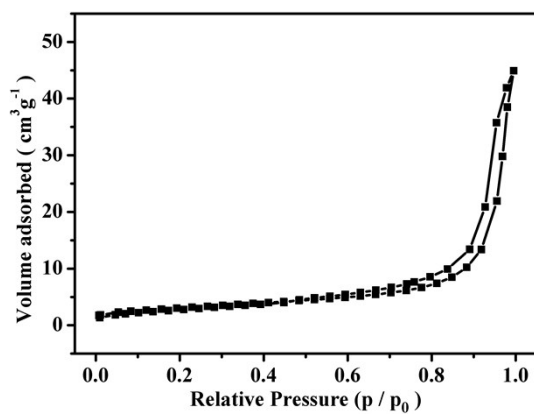

Fig. S13 N<sub>2</sub> adsorption-desorption isotherm of Cu<sub>3</sub>P@C15.

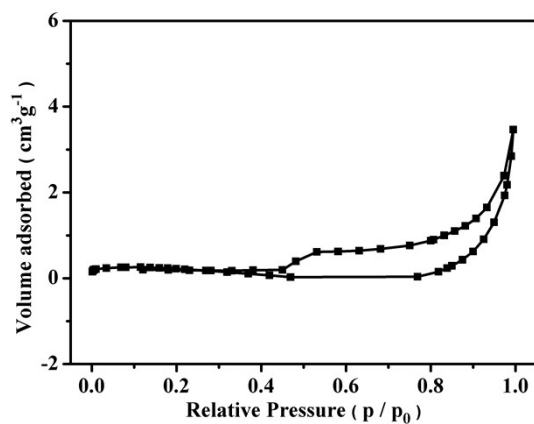

Fig. S14 N<sub>2</sub> adsorption-desorption isotherm of Cu<sub>3</sub>P powder.

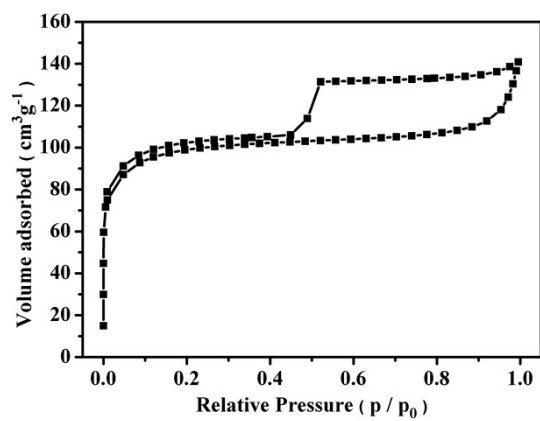

**Fig. S15** N<sub>2</sub> adsorption-desorption isotherm of C<sup>P</sup>.

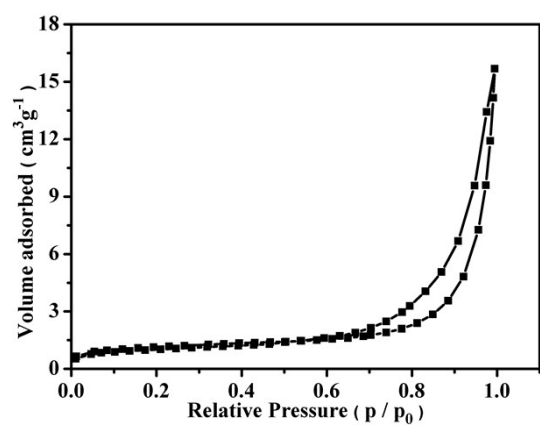

**Fig. S16** N<sub>2</sub> adsorption-desorption isotherm of Cu<sub>3</sub>P/C.

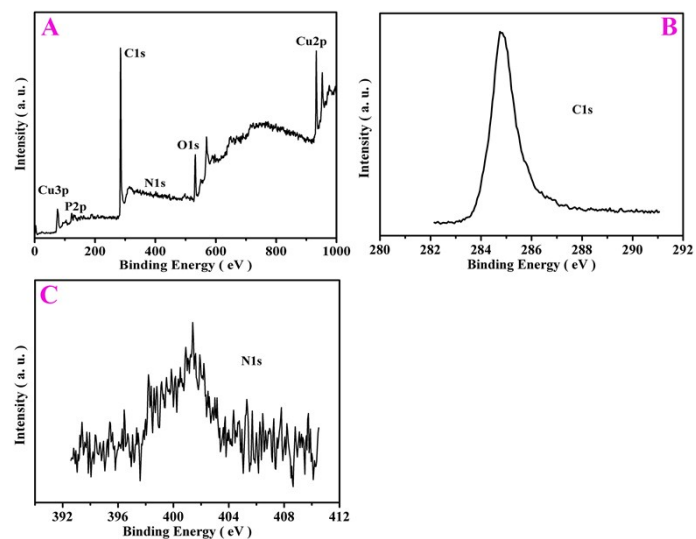

**Fig. S17** XPS spectrum (A), XPS-C1s (B) and XPS-N1s (C) of Cu<sub>3</sub>P@C<sub>5</sub>

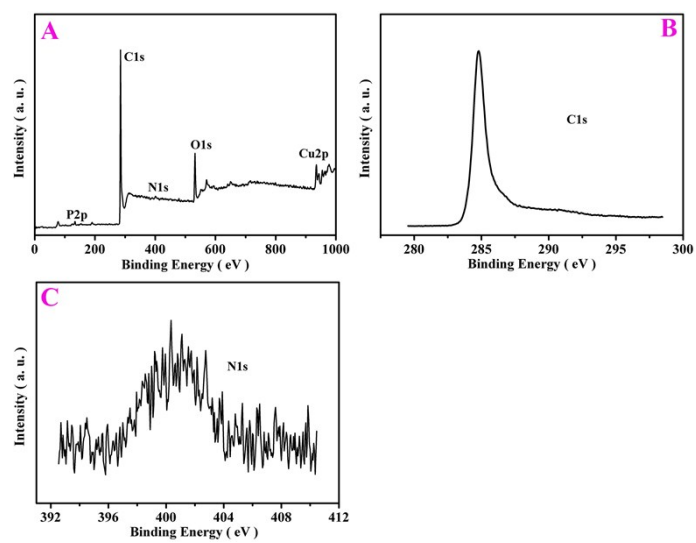

**Fig. S18** XPS spectrum (A), XPS-C1s (B) and XPS-N1s (C) of Cu<sub>3</sub>P@C<sub>15</sub>

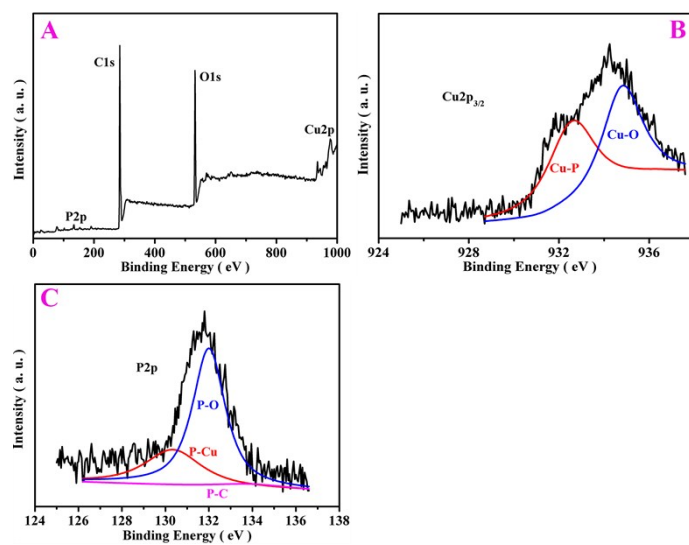

**Fig. S19** XPS spectrum (A), XPS-Cu2p<sub>3/2</sub> (B) and XPS-P2p (C) of  $\text{Cu}_3\text{P}$  powder

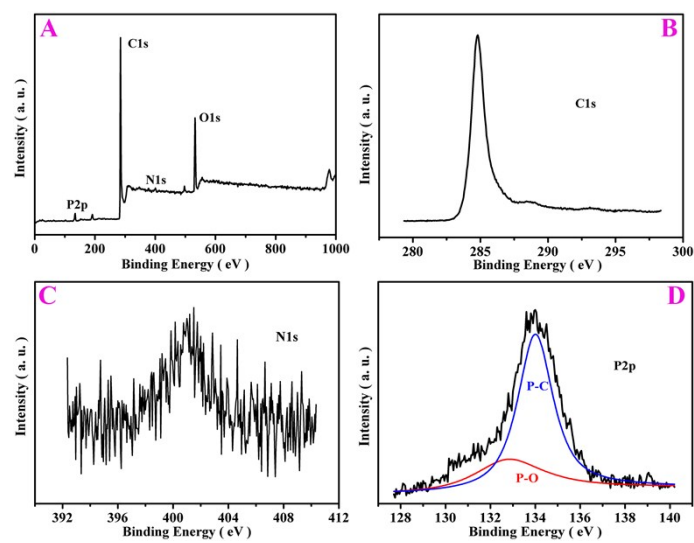

**Fig. S20** XPS spectrum (A), XPS-C1s (B), XPS-N1s (C) and XPS-P2p (D) of  $\text{C}^{\text{P}}$

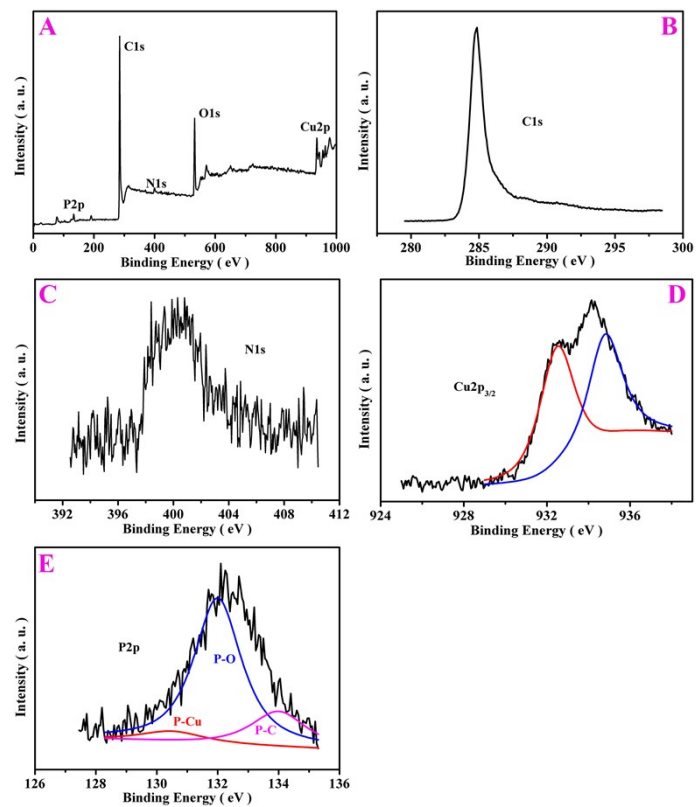

**Fig. S21** XPS spectrum (A), XPS-C1s (B), XPS-N1s (C), XPS-Cu2p<sub>3/2</sub> (D) and XPS-P2p (E) of Cu<sub>3</sub>P/C

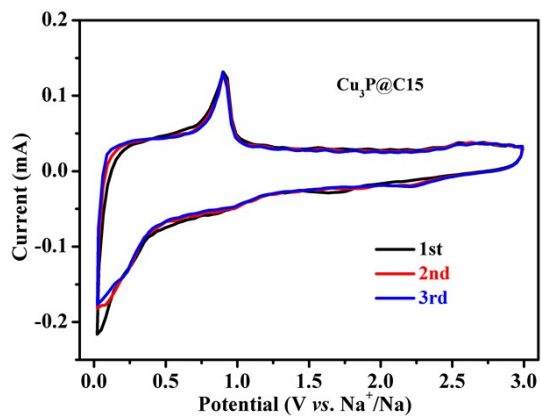

**Fig. S22** Cyclic voltammogram (CV) curves of  $\text{Cu}_3\text{P}@C15$  at  $0.1 \text{ mV s}^{-1}$  between 0.01 and 3.0 V vs.  $\text{Na}^+/\text{Na}$ .

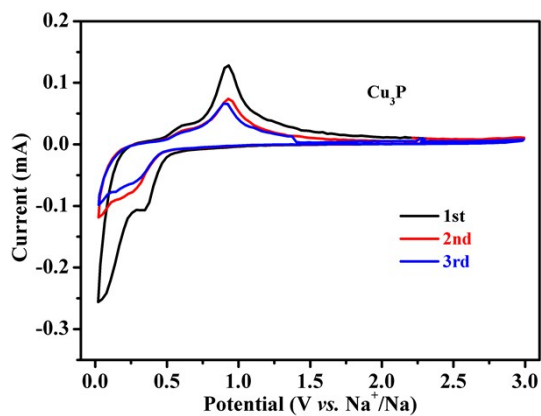

**Fig. S23** CV curves of  $\text{Cu}_3\text{P}$  powder at  $0.1 \text{ mV s}^{-1}$  between 0.01 and 3.0 V vs.  $\text{Na}^+/\text{Na}$ .

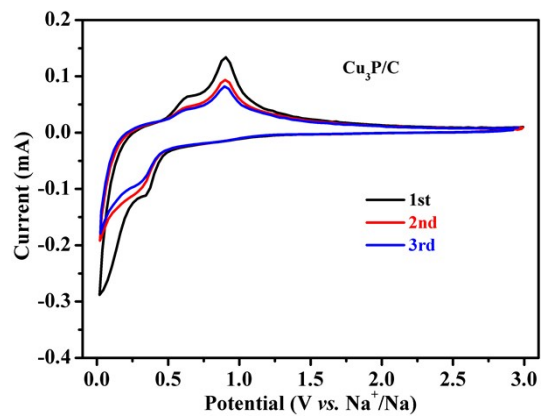

**Fig. S24** CV curves of  $\text{Cu}_3\text{P}/C$  at  $0.1 \text{ mV s}^{-1}$  between 0.01 and 3.0 V vs.  $\text{Na}^+/\text{Na}$ .

**Table S2.** Comprehensive overview of recently reported metal phosphide-based SIB electrode materials.

| Metal phosphide                                                                        | Synthesis method      | Discharge current (mA g <sup>-1</sup> ) | Cycle number | Discharge capacities (2 <sup>nd</sup> cycle to final cycle mAh g <sup>-1</sup> ) | Decay capacity per cycle (mAh g <sup>-1</sup> ) | Decay ratio per cycle (%) |
|----------------------------------------------------------------------------------------|-----------------------|-----------------------------------------|--------------|----------------------------------------------------------------------------------|-------------------------------------------------|---------------------------|
| Cu <sub>3</sub> P/CNS <sup>[S24]</sup>                                                 | Solid state synthesis | 1000                                    | 100          | ~176 to 151                                                                      | 0.250                                           | 0.142%                    |
| Cu <sub>3</sub> P(CPNW) <sup>[S17]</sup>                                               | Thermal decomposition | 1000                                    | 260          | 196 to 134                                                                       | 0.238                                           | 0.122%                    |
| CuP <sub>2</sub> /C <sup>[S25]</sup>                                                   | Ball milling          | 200                                     | 100          | ~450 to ~430                                                                     | 0.200                                           | 0.044%                    |
| CuP <sub>2</sub> /C <sup>[S23]</sup>                                                   | Ball milling          | 150                                     | 30           | ~450 to ~430                                                                     | 0.667                                           | 0.347%                    |
| CuP <sub>2</sub> /C <sup>[S26]</sup>                                                   | Ball milling          | 500                                     | 200          | ~550 to 379                                                                      | 0.855                                           | 0.155%                    |
| Cu <sub>3</sub> P-Co <sub>2</sub> P <sup>[S27]</sup>                                   | Electrospinning       | 5000                                    | 2000         | ~600 to 317                                                                      | 0.142                                           | 0.024%                    |
| FeP(FePNC) <sup>[S28]</sup>                                                            | Thermal decomposition | 200                                     | 200          | ~293 to 275                                                                      | 0.090                                           | 0.031%                    |
| FeP/NPG <sup>[S29]</sup>                                                               | Thermal decomposition | 1000                                    | 700          | 422 to 378                                                                       | 0.063                                           | 0.015%                    |
| CNT@FeP@C <sup>[S30]</sup>                                                             | Thermal decomposition | 500                                     | 500          | 328 to 295                                                                       | 0.066                                           | 0.013%                    |
| H-FeP@C@GR <sup>[S31]</sup>                                                            | Thermal decomposition | 100                                     | 250          | ~730 to 400                                                                      | 1.320                                           | 0.181%                    |
| CoP/FeP <sup>[S32]</sup>                                                               | Thermal decomposition | 100                                     | 200          | ~653 to 456                                                                      | 0.985                                           | 0.151%                    |
| Co <sub>2</sub> P-3D PNC <sup>[S33]</sup>                                              | Thermal decomposition | 500                                     | 700          | ~360 to 271                                                                      | 0.127                                           | 0.035%                    |
| A-Co <sub>2</sub> P/C <sub>x</sub> N <sub>y</sub> B <sub>z</sub> -650 <sup>[S34]</sup> | Solid state synthesis | 200                                     | 100          | 251 to 217                                                                       | 0.340                                           | 0.135%                    |
| CoP@C-RGO-NF <sup>[S35]</sup>                                                          | Thermal decomposition | 100                                     | 100          | ~910 to 473                                                                      | 4.370                                           | 0.480%                    |
| CoP@DC@GR <sup>[S36]</sup>                                                             | Thermal decomposition | 500                                     | 200          | 569 to 398                                                                       | 0.855                                           | 0.150%                    |
| CoP <sub>3</sub> @C <sup>[S37]</sup>                                                   | Ball milling          | 300                                     | 260          | ~240 to 146                                                                      | 0.362                                           | 0.151%                    |
| Ni <sub>1.5</sub> Co <sub>1.5</sub> P <sub>x</sub> <sup>[S38]</sup>                    | Thermal decomposition | 1C                                      | 100          | 600 to ~189                                                                      | 4.110                                           | 0.685%                    |
| Ni <sub>2</sub> P@C <sup>[S39]</sup>                                                   | Thermal decomposition | 50                                      | 100          | ~380 to 296                                                                      | 0.840                                           | 0.221%                    |

|                                                 |                                |      |      |              |       |        |
|-------------------------------------------------|--------------------------------|------|------|--------------|-------|--------|
| Ni <sub>2</sub> P@NPC [S40]                     | Solid state synthesis          | 500  | 1200 | ~240 to 181  | 0.049 | 0.020% |
| Ni <sub>2</sub> P/NG/Ni <sub>2</sub> P [S41]    | Thermal decomposition          | 1000 | 400  | ~225 to 108  | 0.295 | 0.131% |
| Ni <sub>2</sub> P⊂pGN [S42]                     | Solid state synthesis          | 200  | 100  | ~270 to 161  | 1.090 | 0.404% |
| Ni <sub>2</sub> P/3DG-8 [S43]                   | Thermal decomposition          | 1000 | 100  | ~850 to 230  | 6.200 | 0.729% |
| Ni <sub>2</sub> P@C/GA [S44]                    | Thermal decomposition          | 1000 | 2000 | ~400 to 125  | 0.138 | 0.034% |
| V <sub>4</sub> P <sub>7</sub> /5P [S45]         | Ball milling                   | 500  | 100  | 613 to 294   | 3.190 | 0.520% |
| Cu <sub>4</sub> SnP <sub>10</sub> /MWCNTs [S46] | Solvothermal synthesis         | 1000 | 100  | ~600 to 325  | 2.75  | 0.458% |
| MGeP <sub>x</sub> [S47]                         | Solid state synthesis          | 1200 | 200  | ~1100 to 278 | 4.110 | 0.374% |
| WP/CC [S48]                                     | Thermal decomposition          | 2000 | 1000 | ~300 to 50   | 0.250 | 0.083% |
| Sn <sub>4</sub> P <sub>3</sub> /GA-2 [S49]      | Thermal decomposition          | 100  | 100  | ~820 to 657  | 1.630 | 0.199% |
| Sn <sub>4</sub> P <sub>3</sub> @C [S50]         | Thermal decomposition          | 100  | 120  | ~780 to 700  | 0.667 | 0.085% |
| Sn <sub>4</sub> P <sub>3</sub> @C [S51]         | Solvothermal synthesis         | 1500 | 400  | ~670 to 360  | 0.775 | 0.116% |
| Sn <sub>4</sub> P <sub>3</sub> [S52]            | Solvothermal synthesis“        | 200  | 250  | 480 to 303   | 0.708 | 0.148% |
| Sn <sub>4</sub> P <sub>3</sub> @C [S53]         | Solvothermal synthesis         | 2000 | 500  | 726 to 368   | 0.716 | 0.099% |
| Sn <sub>4</sub> P <sub>3</sub> -C [S54]         | Solvothermal synthesis         | 2000 | 2000 | ~700 to 420  | 0.140 | 0.020% |
| Sn <sub>4</sub> P <sub>3</sub> [S55]            | Solution-Liquid- Solid Growth  | 500  | 80   | 488 to 400   | 1.100 | 0.225% |
| Sn <sub>4</sub> P <sub>3</sub> /RGO [S56]       | Solvothermal                   | 1000 | 1500 | ~690 to 362  | 0.219 | 0.032% |
| Sn <sub>4</sub> P <sub>3</sub> [S57]            | Solvothermal                   | 100  | 100  | ~570 to 473  | 0.970 | 0.170% |
| Sn <sub>4</sub> P <sub>3</sub> (SPPG) [S58]     | Ball milling                   | 2000 | 1000 | 561 to 371   | 0.190 | 0.034% |
| Cu <sub>3</sub> P@C5 (this work)                | Epitaxial phosphidation growth | 5000 | 2000 | 162 to 118   | 0.022 | 0.013% |



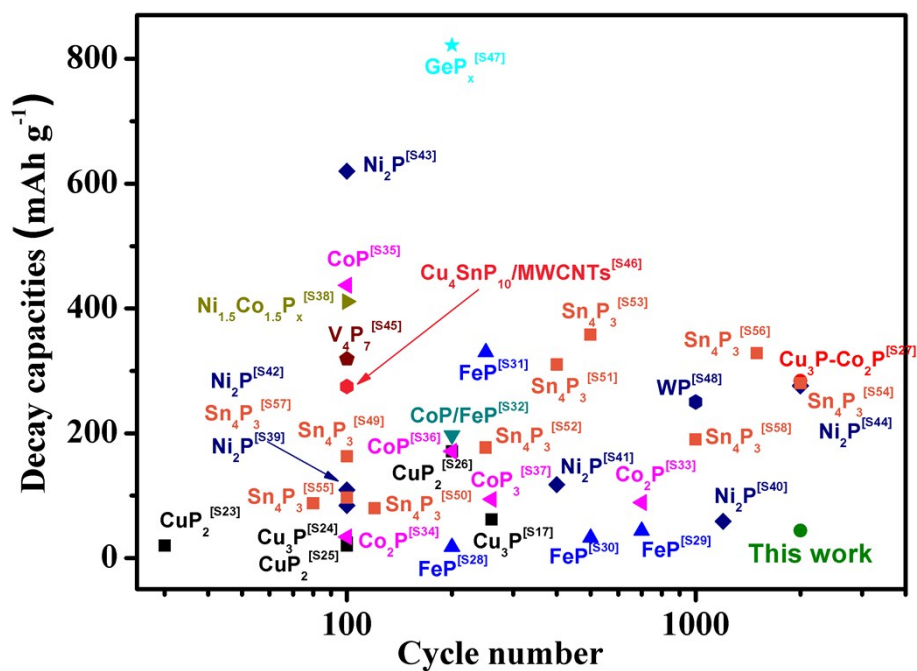

Fig. S25 Decay capacities of metal phosphide-based SIB electrode materials recently reported in the literature (within Fig. “This work“ in green text refers to Cu<sub>3</sub>P@C5).

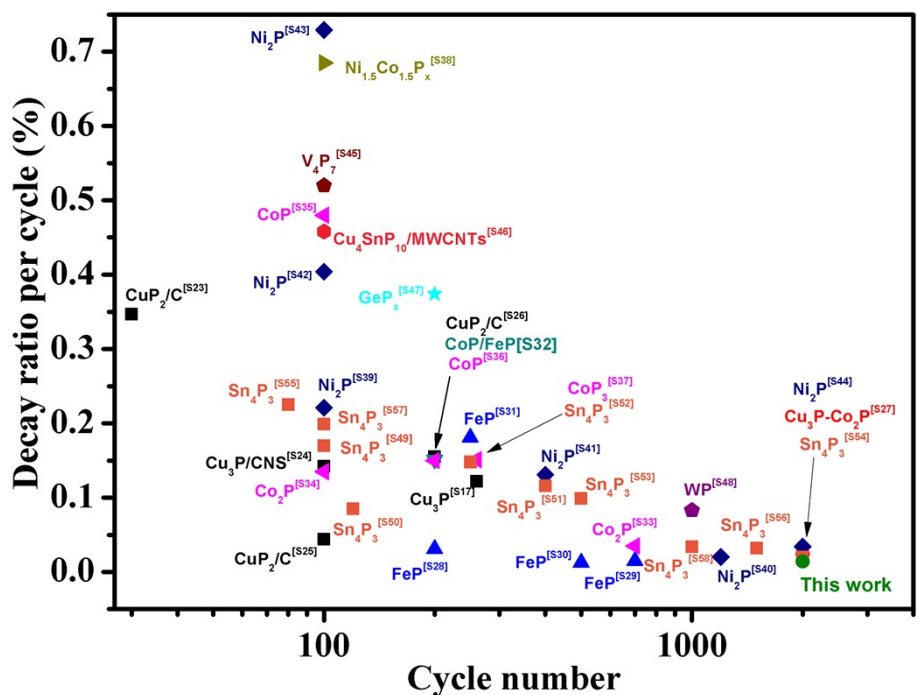

Fig. S26 Capacity decay ratio per cycle of metal phosphide-based SIB electrode materials recently reported in the literature (within Fig. “This work“ in green text refers to Cu<sub>3</sub>P@C5).

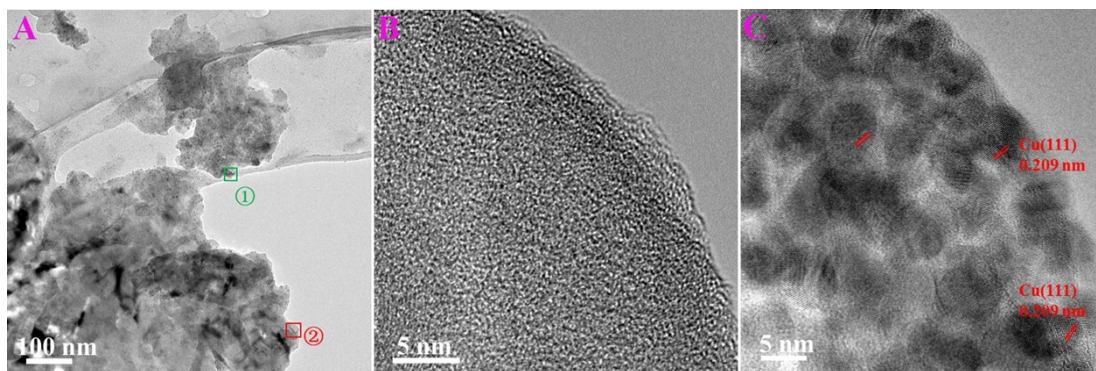

**Fig. S27** TEM images of  $\text{Cu}_3\text{P}/\text{C}$  after 300 cycles.

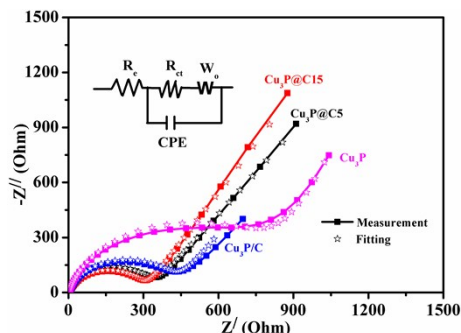

**Fig. S28** EIS spectra and equivalent circuit of  $\text{Cu}_3\text{P}@C5$ ,  $\text{Cu}_3\text{P}@C15$ ,  $\text{Cu}_3\text{P}/C$  and  $\text{Cu}_3\text{P}$ . (Where  $R_e$ ,  $R_{ct}$ , CPE, and  $W_0$  in the fitted equivalent circuit are electrolyte resistance, charge-transfer resistance at the electrode/electrolyte interface, constant phase element impedance, and Warburg impedance, respectively.)

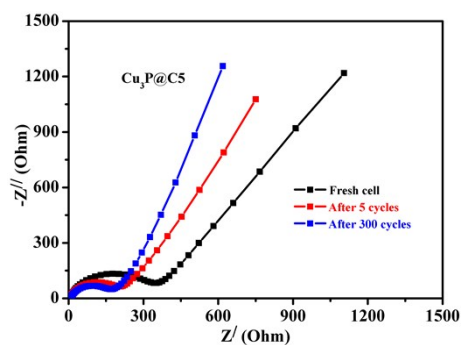

**Fig. S29** EIS spectra of  $\text{Cu}_3\text{P}@C5$  before cycling and after different cycles in a fully charged state.

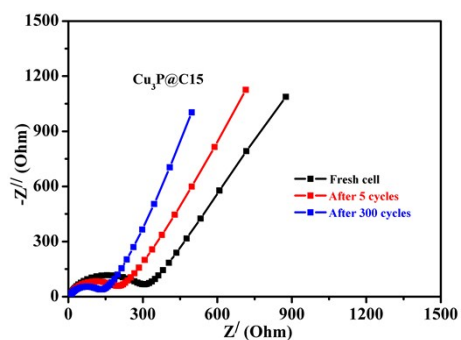

**Fig. S30** EIS spectra of  $\text{Cu}_3\text{P}@C15$  before cycling and after different cycles in a fully charged state.

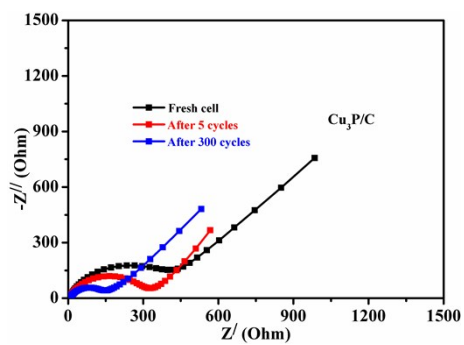

**Fig. S31** EIS spectra of  $\text{Cu}_3\text{P}/\text{C}$  before cycling and after different cycles in a fully charged state.

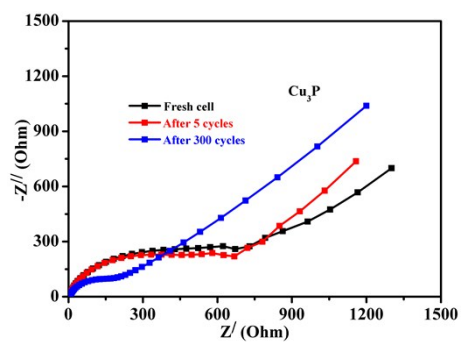

**Fig. S32** EIS spectra of  $\text{Cu}_3\text{P}$  before cycling and after different cycles in a fully charged state.

## References

- [S1] B. Mauvernay, M. L. Doublet and L. Monconduit, *Journal of Physics and Chemistry of Solids*, **2006**, 67, 1252.
- [S2] M. Chandrasekar and S. Mitra, *Electrochimica Acta*, **2013**, 92, 47.
- [S3] M.-P. Bichat, T. Politova, H. Pfeiffer, F. Tancret, L. Monconduit, J.-L. Pascal, T. Brousse and F. Favier, *Journal of Power Sources*, **2004**, 136, 80.
- [S4] M. Bichat, T. Politova, J. Pascal, F. Favier and L. Monconduit, *Journal of The Electrochemical Society*, **2004**, 151, A2074.
- [S5] Y. Xie, H. Su, X. Qian, X. Liu and Y. Qian, *Journal of Solid State Chemistry*, **2000**, 149, 88.
- [S6] S. Carencio, Y. Hu, I. Florea, O. Ersen, C. Boissière, N. Mézailles and C. Sanchez, *Chemistry of Materials*, **2012**, 24, 4134.
- [S7] Z. Sun, Q. Yue, J. Li, J. Xu, H. Zheng and P. Du, *Journal of Materials Chemistry A*, **2015**, 3, 10243.
- [S8] C. Villevieille, F. Robert, P. L. Taberna, L. Bazin, P. Simon and L. Monconduit, *Journal of Materials Chemistry*, **2008**, 18, 5956.
- [S9] M. C. Stan, R. Klöpsch, A. Bhaskar, J. Li, S. Passerini and M. Winter, *Advanced Energy Materials*, **2013**, 3, 231.
- [S10] H. Pfeiffer, F. Tancret, M.-P. Bichat, L. Monconduit, F. Favier and T. Brousse, *Electrochemistry communications*, **2004**, 6, 263.
- [S11] H. Pfeiffer, F. Tancret and T. Brousse, *Electrochimica Acta*, **2005**, 50, 4763.
- [S12] F. Poli, A. Wong, J. S. Kshetrimayum, L. Monconduit and M. Letellier, *Chemistry of Materials*, **2016**, 28, 1787.
- [S13] S. Liu, Y. Qian and L. Xu, *Solid State Communications*, **2009**, 149, 438.
- [S14] X. Wang, K. Han, Y. Gao, F. Wan and K. Jiang, *Journal of Crystal Growth*, **2007**, 307, 126.
- [S15] H. Su, Y. Xie, B. Li, X. Liu and Y. Qian, *Solid State Ionics*, **1999**, 122, 157.
- [S16] G. Manna, R. Bose and N. Pradhan, *Angewandte Chemie International Edition*,

2013, 52, 6762.

- [S17] M. Fan, Y. Chen, Y. Xie, T. Yang, X. Shen, N. Xu, H. Yu and C. Yan, *Advanced Functional Materials*, **2016**, 26, 5019.
- [S18] L. De Trizio, A. Figuerola, L. Manna, A. Genovese, C. George, R. Brescia, Z. Saghi, R. Simonutti, M. Van Huis and A. Falqui, *Acs Nano*, **2011**, 6, 32.
- [S19] J. Liu, M. Meyns, T. Zhang, J. Arbiol, A. Cabot and A. Shavel, *Chemistry of Materials*, **2018**, 30, 1799.
- [S20] S. Ni, J. Ma, X. Lv, X. Yang and L. Zhang, *Journal of Materials Chemistry A*, **2014**, 2, 20506.
- [S21] B. M. Barry and E. G. Gillan, *Chemistry of Materials*, **2008**, 20, 2618.
- [S22] B. M. Barry and E. G. Gillan, *Chemistry of Materials*, **2009**, 21, 4454.
- [S23] F. Zhao, N. Han, W. Huang, J. Li, H. Ye, F. Chen and Y. Li, *Journal of Materials Chemistry A*, **2015**, 3, 21754.
- [S24] M. Kong, H. Song and J. Zhou, *Advanced Energy Materials*, 2018, **8**, 1801489.
- [S25] S. O. Kim and A. Manthiram, *Chemical Communications*, 2016, **52**, 4337.
- [S26] S. Kaushik, J. Hwang, K. Matsumoto, Y. Sato and R. Hagiwara, *ChemElectroChem*, 2018, **5**, 1340-1344.
- [S27] J. Li, X. Li, P. Liu, X. Zhu, R. N. Ali, H. Naz, Y. Yu and B. Xiang, *ACS Applied Materials & Interfaces*, 2019, **11**, 11442-11450.
- [S28] Y. Von Lim, S. Huang, Y. Zhang, D. Kong, Y. Wang, L. Guo, J. Zhang, Y. Shi, T. P. Chen, L. K. Ang and H. Y. Yang, *Energy Storage Materials*, 2018, **15**, 98-107.
- [S29] Y. Wang, Q. Fu, C. Li, H. Li and H. Tang, *ACS Sustainable Chemistry & Engineering*, 2018, **6**, 15083-15091.
- [S30] F. Han, C. Y. J. Tan and Z. Gao, *ChemElectroChem*, 2016, **3**, 1054-1062.
- [S31] X. Wang, K. Chen, G. Wang, X. Liu and H. Wang, *ACS Nano*, 2017, **11**, 11602-11616.
- [S32] Z. Li, L. Zhang, X. Ge, C. Li, S. Dong, C. Wang and L. Yin, *Nano Energy*, 2017, **32**, 494-502.

- [S33] D. Zhou and L.-Z. Fan, *Journal of Materials Chemistry A*, 2018, **6**, 2139-2147.
- [S34] Y.-M. Xing, X.-H. Zhang, D.-H. Liu, W.-H. Li, L.-N. Sun, H.-B. Geng, J.-P. Zhang, H.-Y. Guan and X.-L. Wu, *ChemElectroChem*, 2017, **4**, 1395-1401.
- [S35] X. Ge, Z. Li and L. Yin, *Nano Energy*, 2017, **32**, 117-124.
- [S36] B. Wang, K. Chen, G. Wang, X. Liu, H. Wang and J. Bai, *Nanoscale*, 2019, **11**, 968-985.
- [S37] W. Zhao, X. Ma, G. Wang, X. Long, Y. Li, W. Zhang and P. Zhang, *Applied Surface Science*, 2018, **445**, 167-174.
- [S38] X.-W. Wang, H.-P. Guo, J. Liang, J.-F. Zhang, B. Zhang, J.-Z. Wang, W.-B. Luo, H.-K. Liu and S.-X. Dou, *Advanced Functional Materials*, 2018, **28**, 1801016.
- [S39] J. Wang, B. Wang, X. Liu, G. Wang, H. Wang and J. Bai, *Journal of Colloid and Interface Science*, 2019, **538**, 187-198.
- [S40] S. Shi, Z. Li, Y. Sun, B. Wang, Q. Liu, Y. Hou, S. Huang, J. Huang and Y. Zhao, *Nano Energy*, 2018, **48**, 510-517.
- [S41] C. Dong, L. Guo, Y. He, C. Chen, Y. Qian, Y. Chen and L. Xu, *Energy Storage Materials*, 2018, **15**, 234-241.
- [S42] C. Wu, P. Kopold, P. A. van Aken, J. Maier and Y. Yu, *Advanced Materials*, 2017, **29**.
- [S43] H. Li, X. Wang, Z. Zhao, Z. Tian, D. Zhang and Y. Wu, *ChemElectroChem*, 2019, **6**, 404-412.
- [S44] X. Miao, R. Yin, X. Ge, Z. Li and L. Yin, *Small*, 2017, **13**, 1702138.
- [S45] S. Kaushik, K. Matsumoto, Y. Sato and R. Hagiwara, *Electrochemistry Communications*, 2019, **102**, 46-51.
- [S46] D. Lan, W. Wang and L. Quan, *Nano Energy*, 2017, **39**, 506-512.
- [S47] K.-W. Tseng, S.-B. Huang, W.-C. Chang and H.-Y. Tuan, *Chemistry of Materials*, 2018, **30**, 4440-4447.
- [S48] Q. Pan, H. Chen, Z. Wu, Y. Wang, B. Zhong, L. Xia, H. Y. Wang, G. Cui, X. Guo and X. Sun, *Chemistry-A European Journal*, 2019, **25**, 971.

- [S49] E. Pan, Y. Jin, C. Zhao, M. Jia, Q. Chang, R. Zhang and M. Jia, *Applied Surface Science*, 2019, **475**, 12-19.
- [S50] X. Fan, T. Gao, C. Luo, F. Wang, J. Hu and C. Wang, *Nano Energy*, 2017, **38**, 350-357.
- [S51] J. Liu, P. Kopold, C. Wu, P. A. van Aken, J. Maier and Y. Yu, *Energy & Environmental Science*, 2015, **8**, 3531-3538.
- [S52] H. Sheng, M. Chao, X. Min, R. Shan and Y. Meng, *Sustainable Energy & Fuels*, 2017, **1**, 1944-1949.
- [S53] L. Ma, P. Yan, S. Wu, G. Zhu and Y. Shen, *Journal of Materials Chemistry A*, 2017, **5**.
- [S54] J. H. Choi, W. S. Kim, K. H. Kim and S. H. Hong, *Journal of Materials Chemistry A*, 2018, **6**, 17437-17443.
- [S55] D. Lan, W. Wang, L. Shi, Y. Huang, L. Hu and Q. Li, *Journal of Materials Chemistry A*, 2017, **5**, 5791-5796.
- [S56] Q. Li, Z. Li, Z. Zhang, C. Li, J. Ma, C. Wang, X. Ge, S. Dong and L. Yin, *Advanced Energy Materials*, 2016, **6**, 1600376.
- [S57] H. S. Shin, K. N. Jung, Y. N. Jo, M. S. Park, H. Kim and J. W. Lee, *Scientific Reports*, 2016, **6**, 26195.
- [S58] Y. Xu, B. Peng and F. M. Mulder, *Advanced Energy Materials*, 2018, **8**, 1701847.
